# Supplementary material for: Impact of Novel Active Layer-by-Layer Edible Coating on the Qualitative and Biochemical Traits of Minimally Processed ‘Annurca Rossa del Sud’ Apple Fruit
Source: MDPI journal article supplement (doi:10.3390/ijms24098315), 2023-05-05
Supplement: s1 [file s1]

**Table S1.** Colour parameters (L\*: lightness; BI: browning index %) of control (C) and treated with CMC+SA (TA), CMC+SA+CA (TB), CMC+SA+AO (TC) and CMC+SA+CA+AO (TD) fresh cut ‘Annurca Rossa del Sud’ apple after 0 (T0), 4 (T1), 8 (T2) and 12 days (T3) of cold storage at 4 °C ± 0.5. The results are reported as mean ± standard deviation. Means followed by the same letter do not differ significantly at *P* = 0.05 (Duncan’s test).

| Colour Parameters | Timing | C               | TA              | TB              | TC              | TD              |
|-------------------|--------|-----------------|-----------------|-----------------|-----------------|-----------------|
| L*                | T0     | 96.22 ± 0.81 l  |
|                   | T1     | 87.72 ± 0.52 i  | 73.74 ± 0.20 b  | 71.69 ± 0.23 a  | 85.92 ± 0.37 h  | 87.93 ± 0.32 i  |
|                   | T2     | 81.42 ± 1.06 f  | 79.24 ± 1.24 e  | 77.52 ± 1.50 d  | 79.26 ± 1.00 e  | 88.77 ± 0.74 i  |
|                   | T3     | 79.80 ± 0.46 e  | 75.91 ± 1.15 c  | 79.08 ± 1.03 e  | 79.77 ± 0.14 e  | 84.39 ± 0.29 f  |
| a*                | T0     | -3.44 ± 0.16 bc |
|                   | T1     | -3.80 ± 0.08 a  | -2.58 ± 0.09 d  | -3.51 ± 0.19 bc | -3.57 ± 0.04 bc | -3.13 ± 0.10 c  |
|                   | T2     | 2.78 ± 0.21 g   | 1.93 ± 0.05 f   | -4.22 ± 0.06 a  | -3.55 ± 0.11 bc | -0.87 ± 0.77 e  |
|                   | T3     | 8.75 ± 0.20 i   | 9.77 ± 0.48 l   | 4.19 ± 0.29 i   | -2.46 ± 0.14 d  | -2.54 ± 0.13 d  |
| b*                | T0     | 26.77 ± 0.13 b  |
|                   | T1     | 50.52 ± 0.26 h  | 37.59 ± 0.35 e  | 24.77 ± 0.24 a  | 27.64 ± 0.06 b  | 25.21 ± 0.42 a  |
|                   | T2     | 52.55 ± 1.38 i  | 44.35 ± 1.51 g  | 37.75 ± 1.09 e  | 32.10 ± 0.65 c  | 28.03 ± 0.81 b  |
|                   | T3     | 55.74 ± 0.88 l  | 45.40 ± 0.33 g  | 39.58 ± 0.92 f  | 34.84 ± 1.47 d  | 27.45 ± 0.27 b  |
| BI                | T0     | 0 ± 0 a         | 0 ± 0 a         | 0 ± 0 a         | 0 ± 0 a         | 0 ± 0 a         |
|                   | T1     | 51.97 ± 0.80 i  | 34.53 ± 0.74 g  | 16.91 ± 0.74 d  | 5.77 ± 0.14 c   | 1.42 ± 0.52 ab  |
|                   | T2     | 64.73 ± 5.01 l  | 42.72 ± 2.29 h  | 30.30 ± 3.87 f  | 18.07 ± 1.39 d  | 4.47 ± 0.80 bc  |
|                   | T3     | 81.58 ± 3.51 m  | 52.58 ± 1.24 i  | 32.20 ± 0.68 fg | 22.02 ± 2.97 e  | 6.70 ± 0.54 c   |
